# Supplementary material for: Fluorescence sensor based on molecularly imprinted polymers and upconversion micro-particles@metal–organic frameworks for detection of fipronil
Source: Royal Society of Chemistry journal article supplement (doi:10.1039/d5ay01622c), 2025-12-10
Supplement: d5ay01622c1.pdf [file d5ay01622c1.pdf]

# Fluorescence sensor based on molecularly imprinted polymers and upconversion micro-particles@metal-organic frameworks for detection of fipronil

## Supporting information

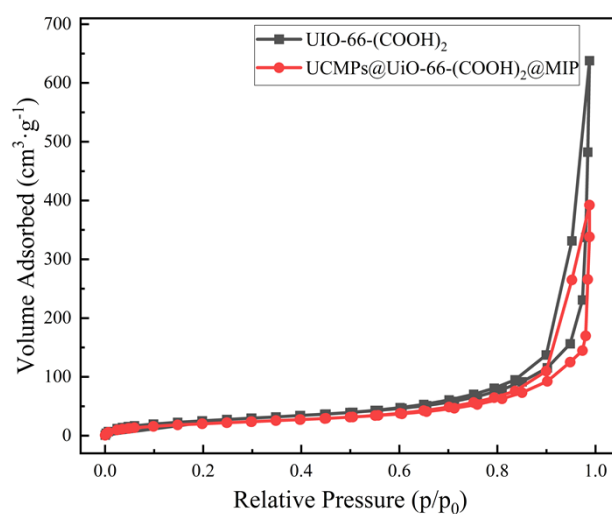

Fig. S1 N<sub>2</sub> adsorption-desorption isotherms of UiO-66-(COOH)<sub>2</sub> and UCMPs@UiO-66-

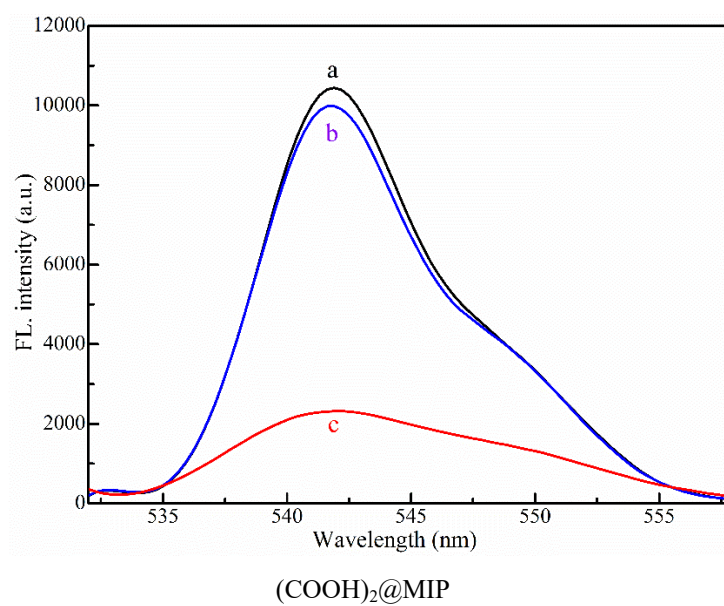

Fig. S2 Fluorescence Response and Quenching Mechanism of UCMPs@UiO-66-(COOH)<sub>2</sub>@MIP to Fipronil (a)-UCMPs@UiO-66-(COOH)<sub>2</sub>@NIP; (b)-UCMPs@UiO-66-(COOH)<sub>2</sub>@MIP after template elution; and (c)-before template elution.

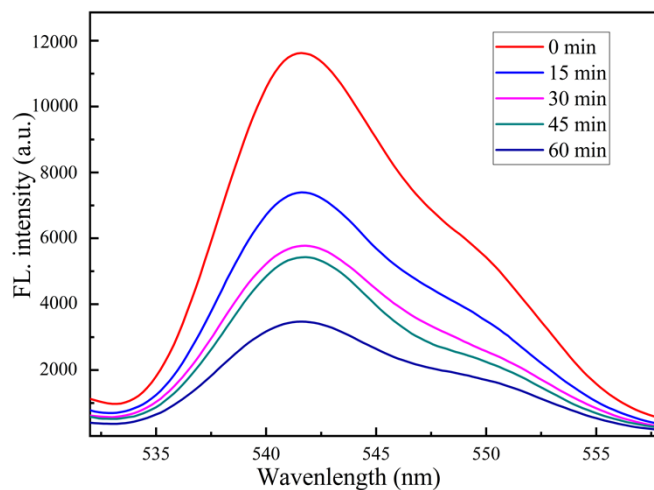

Fig. S3 The effect of adsorption time on fluorescence intensity

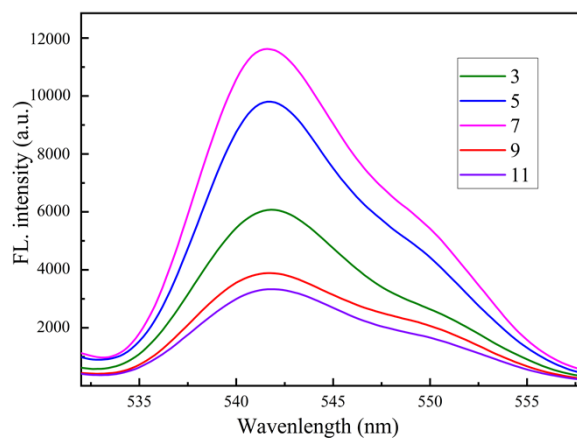

Fig. S4 The effect of pH on fluorescence intensity

Table S1. Summary of the surface area, pore size , and pore volume of the prepared materials.

| BJH-adsorption summary     |                                                             |                           |                                                          |
|----------------------------|-------------------------------------------------------------|---------------------------|----------------------------------------------------------|
| Sample                     | Specific surface area<br>(m <sup>2</sup> ·g <sup>-1</sup> ) | Average pore size<br>(nm) | Total pore volume<br>(cm <sup>3</sup> ·g <sup>-1</sup> ) |
| UiO-66-(COOH) <sub>2</sub> | 98.65                                                       | 3.41                      | 0.242                                                    |
| UCMPs@UiO-66-              | 79.01                                                       | 4.06                      | 0.194                                                    |

(COOH)<sub>2</sub>@MIP

---
